# Supplementary material
Source: publisher figshare collection journal article supplement (https://gsajournals.figshare.com/ndownloader/files/17710724)
Supplement: Supplementary file 1 [file 17710724]

**TABLE S5**

***Hstx2* candidate genes**

The *Hstx2* locus comprises 4 protein coding and 4 predicted protein coding genes expressed in testes.

aPhysical positions given in coordinates of mouse reference C57BL/6J genome NCBI Assembly (GRCm38/GCA_000001635.2)

Expression data were taken from: *Margolin et al. (2014), #Jung et al. (2018), $Ball et al. (2016).

Abbreviations: leptotene, LEP; zygotene, ZYG; pachytene, PA; round spermatids, RS; elongated spermatids, ES. Single nucleotide polymorphisms (SNPs) between B6 and PWD within the protein coding regions.
